# Supplementary material for: A novel strategy to enhance the multiple interface effect using amorphous carbon packaged hydrogenated TiO2for stable and effective microwave absorption
Source: Royal Society of Chemistry journal article supplement (doi:10.1039/c9tc00483a), 2019-01-01
Supplement: c9tc00483a1.pdf [file c9tc00483a1.pdf]

**Electronic Supplementary Material (ESI) for Journal of Materials Chemistry C.  
This journal is © The Royal Society of Chemistry 2019**

## **Supporting Information**

### **A Novel Strategy to Enhance Multiple Interface Effect by Amorphous Carbon Package Hydrogenated TiO<sub>2</sub> for Stable and Effective Microwave Absorption**

*Jianle Xu,<sup>a</sup> Li Sun,<sup>a</sup> Xiaosi Qi,<sup>b</sup> Zhongchi Wang<sup>a</sup>, Qiang Fu<sup>a, c</sup>, and Chunxu Pan<sup>\*a, c</sup>*

<sup>a</sup>School of Physics and Technology, and MOE Key Laboratory of Artificial Micro- and Nanostructures and <sup>c</sup>Center for Electron Microscopy, Wuhan University, Wuhan 430072, P. R. China.

<sup>b</sup>College of Physics, Guizhou University, Guiyang 550025, P. R. China.

\*Author to whom correspondence should be addressed.

Tel: +86-27-68752481 ext.

E-mail: [cspan@whu.edu.cn](mailto:cspan@whu.edu.cn) (C. Pan)

\*Author to whom correspondence should be addressed.

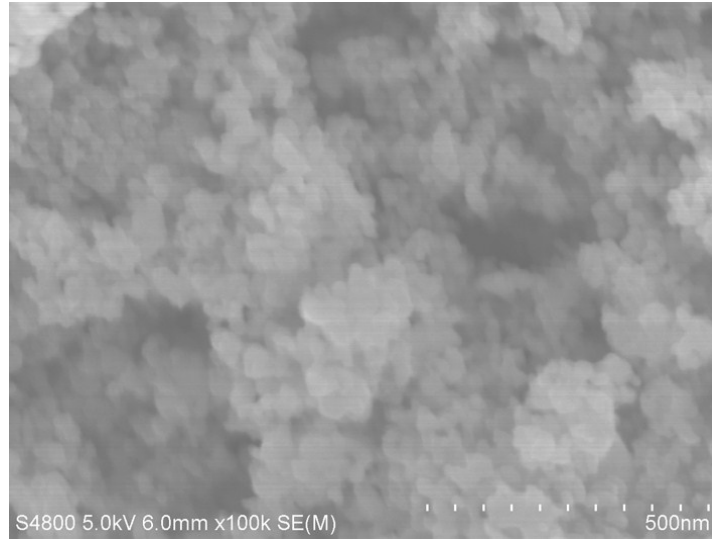

**Fig. S1.** SEM images of black  $\text{TiO}_2$  nanoparticles

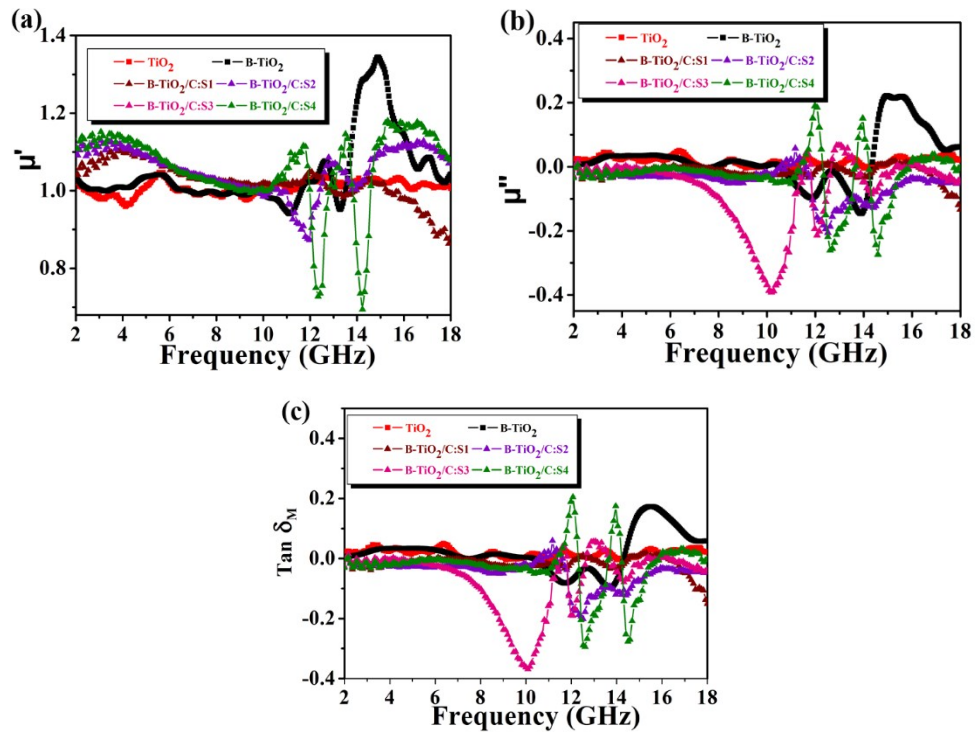

**Fig. S2.** Complex permeability of  $\text{TiO}_2$ , B- $\text{TiO}_2$  and B- $\text{TiO}_2/\text{C}$ : (a) real part, (b) imaginary part, and (c) tangents loss

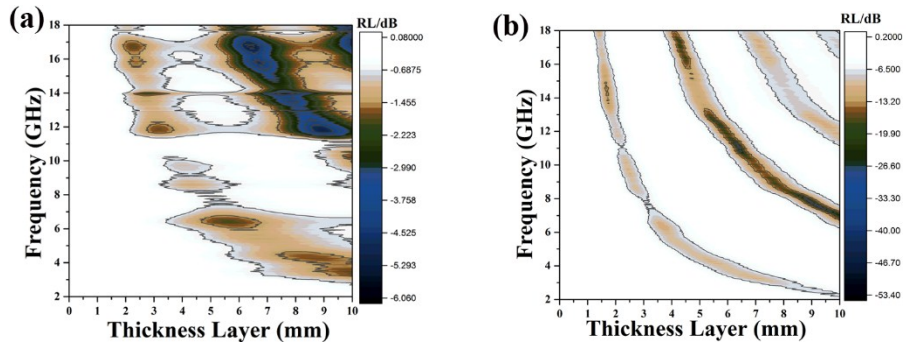

Fig. S3. Two dimensional representation RL values: (a)  $\text{TiO}_2$ , (b) B- $\text{TiO}_2$ .
